# Supplementary material
Source: publisher figshare collection journal article supplement (https://tandf.figshare.com/ndownloader/files/20733948)
Supplement: Supplementary file 1 [file 20733948]

## Sheet: Φύλλο1
X	D
100	1
100	1
12	1
150	1
2100	1
88	1
1800	1
340	1
375	1
63	1
1264	1
7	0
2252	1
3017	1
28	1
310	1
220	1
75	1
45	1
714	1
617	1
140	1
126	1
1186	1
285	1
679	1
148	1
582	1
530	1
7	0
150	1
40	1
240	1
7	0
62	1
255	1
358	1
150	1
7	0
1117	1
178	1
200	1
7	0
66	1
660	1
438	1
150	1
7	1
450	1
430	1
155	1
115	1
367	1
75	1
255	1
250	1
7	0
268	1
88	1
7	0
100	1
62	1
6449	1
258	1
350	1
238	1
50	1
100	1
650	1
450	1
50	1
242	1
647	1
400	1
7	0
45	1
365	1
175	1
50	1
7	0
62	1
200	1
485	1
7	0
7	0
7	0
100	1
75	1
162	1
7	0
7	0
7	0
175	1
375	1
7	0
200	1
162	1
7	1
225	1
